# Supplementary material for: Molecular Dynamics Simulation of Drug Solubilization Behavior in Surfactant and Cosolvent Injections
Source: MDPI journal article supplement (doi:10.3390/pharmaceutics14112366), 2022-11-03
Supplement: s1 [file s1]

# Molecular Dynamics Simulation of Drug Solubilization Behavior in Surfactant and Cosolvent Injections

Meiqi He, Wenwen Zheng, Nannan Wang, Hanlu Gao, Defang Ouyang and Zunnan Huang

**Table S1.** The significance test between the number of hydrogen bonds between water–water (per water) in formulations without cosolvents and the formulations containing cosolvents.

| Systems          | $\bar{x} \pm S$             | 95% CI         | <i>P</i> (Student's <i>t</i> -Test) | <i>P</i> (Mann–Whitney <i>U</i> Test) |
|------------------|-----------------------------|----------------|-------------------------------------|---------------------------------------|
| Cyc <sup>1</sup> | 2.4292+ <sub>−</sub> 0.0066 | 0.0058~0.0139  | <0.001                              | <0.001                                |
| Cyc <sup>2</sup> | 2.4194+ <sub>−</sub> 0.0089 |                |                                     |                                       |
| Doc <sup>1</sup> | 2.4505+ <sub>−</sub> 0.0046 | 0.0113~0.0163  | <0.001                              | <0.001                                |
| Doc <sup>2</sup> | 2.4367+ <sub>−</sub> 0.0050 |                |                                     |                                       |
| Eto <sup>1</sup> | 2.4597+ <sub>−</sub> 0.0039 | −0.0003~0.0041 | 0.093                               | 0.050                                 |
| Eto <sup>2</sup> | 2.4578+ <sub>−</sub> 0.0046 |                |                                     |                                       |
| Pac <sup>1</sup> | 2.4284+ <sub>−</sub> 0.0064 | 0.0602~0.0668  | <0.001                              | <0.001                                |
| Pac <sup>2</sup> | 2.3649+ <sub>−</sub> 0.0062 |                |                                     |                                       |
| Val <sup>1</sup> | 2.2791+ <sub>−</sub> 0.0166 | 0.0591~0.0851  | <0.001                              | <0.001                                |
| Val <sup>2</sup> | 2.2070+ <sub>−</sub> 0.0311 |                |                                     |                                       |
| Cab <sup>1</sup> | 2.4790+ <sub>−</sub> 0.0029 | 0.0023~0.0053  | <0.001                              | <0.001                                |
| Cab <sup>2</sup> | 2.4752+ <sub>−</sub> 0.0029 |                |                                     |                                       |

<sup>1</sup> The system without cosolvents. <sup>2</sup> The system with cosolvents.

**Table S2.** The significance test between the average *R<sub>g</sub>* values of different systems without cosolvents and containing cosolvents during the last 30 ns simulation time.

| Systems          | $\bar{x} \pm S$ | 95% CI      | <i>P</i> (Student's <i>t</i> -Test) | <i>P</i> (Mann–Whitney <i>U</i> Test) |
|------------------|-----------------|-------------|-------------------------------------|---------------------------------------|
| Cyc <sup>1</sup> | 15.68 ± 0.43    | −0.53~−0.50 | <0.001                              | <0.001                                |
| Cyc <sup>2</sup> | 16.20 ± 0.80    |             |                                     |                                       |
| Doc <sup>1</sup> | 17.90 ± 0.65    | −0.22~−0.19 | <0.001                              | <0.001                                |
| Doc <sup>2</sup> | 18.10 ± 0.50    |             |                                     |                                       |
| Eto <sup>1</sup> | 9.52 ± 0.78     | −0.90~−0.84 | <0.001                              | <0.001                                |
| Eto <sup>2</sup> | 10.38 ± 1.20    |             |                                     |                                       |
| Pac <sup>1</sup> | 28.53 ± 2.26    | −7.13~−7.05 | <0.001                              | <0.001                                |
| Pac <sup>2</sup> | 35.62 ± 1.10    |             |                                     |                                       |
| Val <sup>1</sup> | 14.19 ± 0.54    | −0.50~−0.48 | <0.001                              | <0.001                                |
| Val <sup>2</sup> | 14.68 ± 0.49    |             |                                     |                                       |
| Cab <sup>1</sup> | 17.80 ± 0.63    | −0.17~−0.15 | <0.001                              | <0.001                                |
| Cab <sup>2</sup> | 17.96 ± 0.42    |             |                                     |                                       |

<sup>1</sup> The system without cosolvents. <sup>2</sup> The system with cosolvents.
